# Supplementary material for: Surface hardness and flammability of Na2SiO3and nano-TiO2reinforced wood composites
Source: Royal Society of Chemistry journal article supplement (doi:10.1039/c9ra05200c), 2019-01-01
Supplement: c9ra05200c2.pdf [file c9ra05200c2.pdf]

## Supplementary info:

### Surface hardness and flammability of $\text{Na}_2\text{SiO}_3$ and nano- $\text{TiO}_2$ reinforced wood composites

Edita Garskaite<sup>1\*</sup>, Olov Karlsson<sup>1</sup>, Zivile Stankeviciute<sup>2</sup>, Aivaras Kareiva<sup>2</sup>, Dennis Jones<sup>1</sup> and Dick Sandberg<sup>1</sup>

<sup>1</sup>Wood Science and Engineering, Department of Engineering Sciences and Mathematics, Luleå University of Technology, Forskargatan 1, SE-931 87 Skellefteå, Sweden

<sup>2</sup>Institute of Chemistry, Faculty of Chemistry and Geosciences, Vilnius University, Naugarduko 24, Vilnius LT-03225, Lithuania

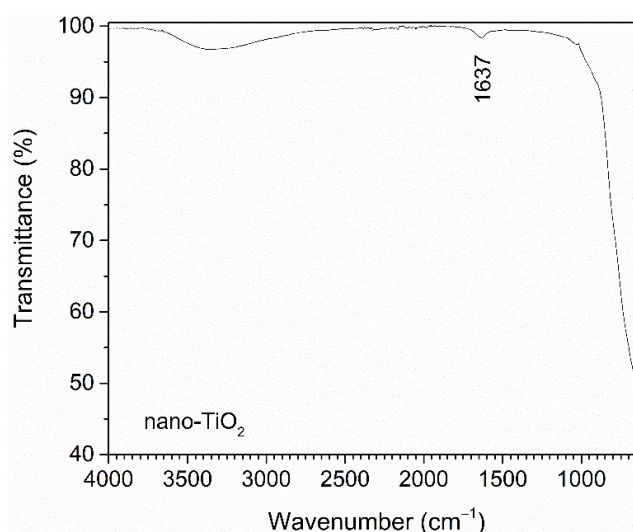

SI. Fig. 1. FT-IR spectrum of  $\text{TiO}_2$  nano-powders.

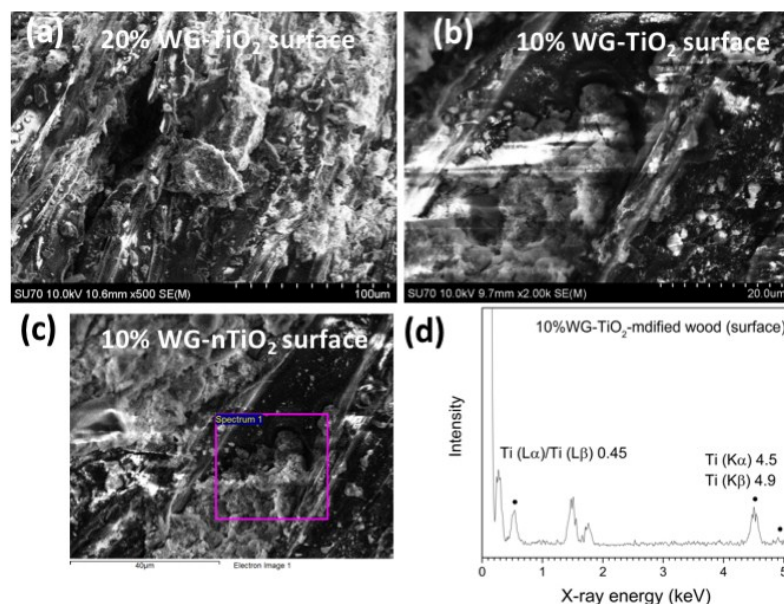

SI. Fig. 2. FE-SEM images of the surface of (a) 20% and (b) 10%-WG- $\text{TiO}_2$ -modified Scots pine sapwood; (c) EDS analysed area and (d) EDS spectrum of the surface of 10%-WG- $\text{TiO}_2$ -modified wood (marked characteristic peaks of  $\text{Ti } L\alpha$  (0.452 keV),  $\text{Ti } L\beta$  (0.458 keV),  $\text{Ti } K\alpha$  (4.52 keV),  $\text{Ti } K\beta$  (4.93 keV)).

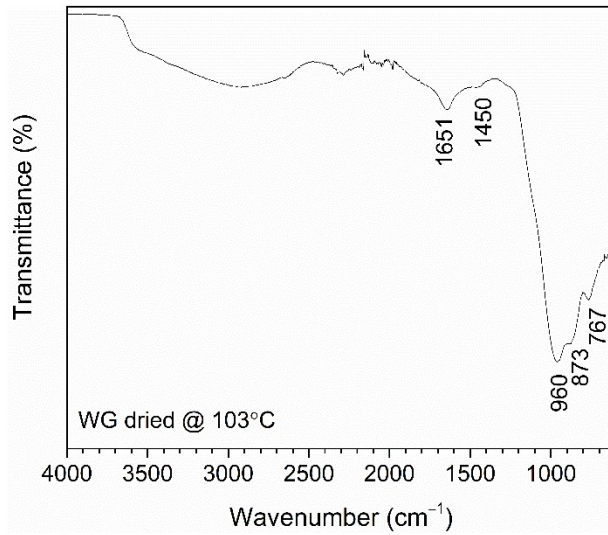

**SI. Fig. 3.** FTIR spectrum of Na-O-Si gel dried for 24 h at 103°C.

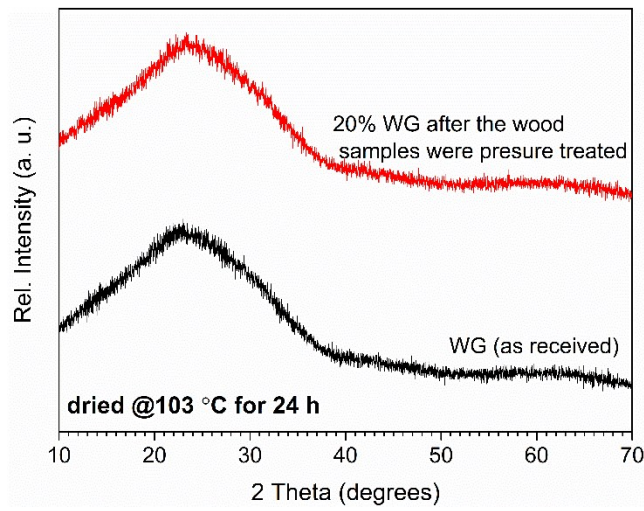

**SI. Fig. 4.** XRD of dried water-glass (WG) powders at 103 °C for 24 h.

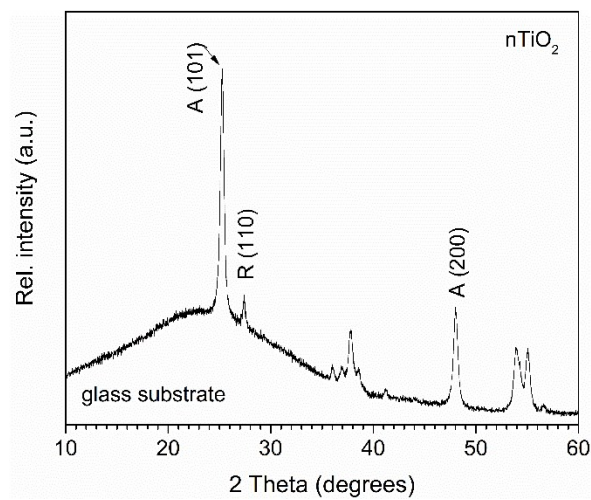

**SI. Fig. 5.** XRD pattern of TiO<sub>2</sub> nano-powders.

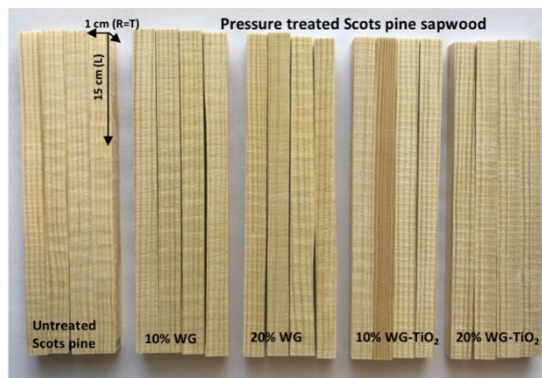

**SI. Fig. 6.** Untreated and pressure treated specimens of Scots pine sapwood used for the LOI test (dimensions of specimens followed according to user's guide for the LOI (11309-850-3) to BS 2782: Part 1: Method 141 and ISO 4589 (form of the specimens II (form of materials that are self-supporting))).

**SI. Video:** Flammability test of wood reinforced with aqueous 20% sodium silicate solution. The video can be found online at the following DOI: [10.1039/C9RA05200C](https://doi.org/10.1039/C9RA05200C)
